[Click here to view linked References](#)

**Effect of stimulus polarity on detection thresholds in cochlear implant users: relationships with average threshold, gap detection, and rate discrimination.**

Robert P. Carlyon<sup>1</sup>, Stefano Cosentino<sup>1</sup>, John M. Deeks,<sup>1</sup>  
Wendy Parkinson<sup>2</sup>, and Julie A. Arenberg<sup>2</sup>

<sup>1</sup>Medical Research Council Cognition and Brain Sciences Unit, University of Cambridge, 15 Chaucer Road, Cambridge, CB2 7EF, United Kingdom.

<sup>2</sup>Department of Speech and Hearing Sciences, University of Washington  
1417 NE 42nd St., Seattle, WA 98105, USA.

Corresponding author:

Robert P. Carlyon, MRC Cognition and Brain Sciences Unit, 15 Chaucer Road, Cambridge, CB2 7EF, UK.

Email: [bob.carlyon@mrc-cbu.cam.ac.uk](mailto:bob.carlyon@mrc-cbu.cam.ac.uk)

Phone: +44 1223 355294

1  
2  
3  
4  
5  
6  
7  
8  
9  
10  
11  
12  
13  
14  
15  
16  
17  
18  
19  
20  
21  
22  
23  
24  
25  
26  
27  
28  
29  
30  
31  
32  
33  
34  
35  
36  
37  
38  
39  
40  
41  
42  
43  
44  
45  
46  
47  
48  
49  
50  
51  
52  
53  
54  
55  
56  
57  
58  
59  
60  
61  
62  
63  
64  
65

## Abstract

1  
2  
3  
4  
5  
6 Previous psychophysical and modelling studies suggest that cathodic stimulation by  
7  
8 a cochlear implant (CI) may preferentially activate the peripheral processes of the  
9  
10 auditory nerve, whereas anodic stimulation may preferentially activate the central  
11  
12 axons. Because neural degeneration typically starts with loss of the peripheral  
13  
14 processes, lower thresholds for cathodic than for anodic stimulation may indicate  
15  
16 good local neural survival. We measured thresholds for 99-pulse-per-second trains  
17  
18 of triphasic (TP) pulses where the central high-amplitude phase was either anodic  
19  
20 (TP-A) or cathodic (TP-C). Thresholds were obtained in monopolar mode from four  
21  
22 or five electrodes and a total of eight ears from subjects implanted with the  
23  
24 Advanced Bionics CI. When between-subject differences were removed, there was  
25  
26 a modest but significant correlation between the polarity effect (TP-C threshold  
27  
28 minus TP-A threshold) and the average of TP-C and TP-A thresholds, consistent  
29  
30 with the hypothesis that a large polarity effect corresponds to good neural  
31  
32 survival. When data were averaged across electrodes for each subject, relatively  
33  
34 low thresholds for TP-C correlated with a high “upper limit” (the pulse rate up to  
35  
36 which pitch continues to increase) from a previous study [Cosentino S, Carlyon RP,  
37  
38 Deeks JM, Parkinson W, Bierer JA (2016) Rate discrimination, gap detection and  
39  
40 ranking of temporal pitch in cochlear implant users. *J Assoc Otolaryngol* 17:371-  
41  
42 382]. Overall the results provide modest indirect support for the hypothesis that  
43  
44 the polarity effect provides an estimate of local neural survival.  
45  
46  
47  
48  
49  
50  
51  
52  
53  
54  
55  
56  
57  
58  
59  
60  
61  
62  
63  
64  
65

## Introduction

1  
2  
3 Many cochlear implant (CI) listeners understand speech well, at least in  
4 quiet. However there remains substantial across-listener variability, with some  
5 struggling even in favorable listening conditions (Holden et al., 2013). In recent  
6 years there has been considerable interest in identifying the reasons for poor  
7 speech perception, and in identifying the relationship between performance and  
8 the global and local pattern of neural survival in each individual patient. A  
9 potentially useful approach comes from single-electrode psychophysical measures,  
10 which have revealed substantial across-listener and across-electrode variability in  
11 a number of tasks. These include signal detection in quiet and supra-threshold  
12 measures. Authors have investigated the variation in not only the absolute level of  
13 thresholds (Pfungst and Xu, 2004; Bierer et al., 2015), but also how they are  
14 influenced by pulse rate (“multi-pulse integration, MPI” ; Zhou and Pfungst, 2014;  
15 Zhou et al., 2015; Zhou and Pfungst, 2016), pulse polarity (Macherey et al., 2017),  
16 and stimulation mode (Bierer, 2007; Bierer and Faulkner, 2010). Supra-threshold  
17 tasks have included modulation detection (Garadat et al., 2012; Garadat et al.,  
18 2013), gap detection (Bierer et al., 2015), and rate discrimination both at low and  
19 high rates (Cosentino et al., 2016). It is worth noting that variation in all of these  
20 measures has been observed even when stimulating in monopolar mode, which is  
21 believed to produce a wide spread of excitation within the cochlea. Indeed, even  
22 though the variation in thresholds across the electrode array is smaller in dB for  
23 monopolar than for tripolar stimulation, this is not true when the across-electrode  
24 standard deviation (s.d.) is normalized by the within-electrode s.d. (Bierer et al.,  
25 2015). In other words, monopolar stimulation may reveal across-electrode

26  
27  
28  
29  
30  
31  
32  
33  
34  
35  
36  
37  
38  
39  
40  
41  
42  
43  
44  
45  
46  
47  
48  
49  
50  
51  
52  
53  
54  
55  
56  
57  
58  
59  
60  
61  
62  
63  
64  
65

1  
2  
3  
4  
5  
6  
7  
8  
9  
10  
11  
12  
13  
14  
15  
16  
17  
18  
19  
20  
21  
22  
23  
24  
25  
26  
27  
28  
29  
30  
31  
32  
33  
34  
35  
36  
37  
38  
39  
40  
41  
42  
43  
44  
45  
46  
47  
48  
49  
50  
51  
52  
53  
54  
55  
56  
57  
58  
59  
60  
61  
62  
63  
64  
65

variation as reliably as tripolar stimulation, even though the size of this variation is smaller in monopolar than in tripolar mode when expressed in dB.

A potentially important application of single-electrode measures is that they may guide the clinician in choosing which, if any, electrodes to de-activate when optimizing patient maps. Indeed, significant improvements in speech perception scores have been obtained by de-activating electrodes based on high modulation detection thresholds (Garadat *et al.*, 2012; Garadat *et al.*, 2013) and high thresholds for low-rate pulse trains (Zhou, 2017). In order to provide a principled approach to channel selection it would be useful to know how the various different single-electrode measures correlate with each other. This could then either reveal clusters of tests, each of which tap a particular consequence of neural degeneration, or reveal a single test factor that could be used to guide channel selection algorithms. This information may also provide basic insights into the limitations of hearing by CI users. For example, Cosentino *et al.* (2016) found that the “upper limit” of temporal pitch - defined as the highest pulse rate on a single electrode above which pitch no longer increased - correlated significantly with gap detection thresholds (GDTs), but not with the smallest difference in the rate of a low-rate pulse train that could be discriminated. The significant difference between these two correlations led them to suggest that there is a limitation specific to tasks that require sustained temporally accurate firing to high pulse rates, and which is separate from that which limits low-rate discrimination. Zhou and colleagues (2016) reported that MPI correlated significantly with the degree of spatial selectivity for a given electrode, and concluded that integration of multiple pulses is most efficient when conveyed by neurons that innervate a wide region of the cochlea.

1 The present study forms part of a series that compares performance on  
2 different single-electrode psychophysical measures in a group of CI users (Bierer et  
3 al., 2015; Cosentino et al., 2016). Here we measure polarity sensitivity, defined as  
4 the difference between thresholds for 99-pps trains of triphasic pulses in which the  
5 short high-amplitude portion is either anodic or cathodic. As with other types of  
6 asymmetric pulse, triphasic stimulation allows one to study polarity sensitivity by  
7 concentrating charge of one polarity into a short time period, whilst maintaining  
8 the charge balancing necessary for patient safety. All stimulation is in monopolar  
9 mode. The motivation stems from the finding that, although animal studies usually  
10 reveal greater sensitivity to cathodic than to anodic stimulation (Hartmann et al.,  
11 1984; Miller et al., 1999; Miller et al., 2004), the reverse is true for human CI users  
12 when presented with stimuli at or close to their most comfortable listening level  
13 ("MCL": Macherey et al., 2006; Macherey et al., 2008; van Wieringen et al., 2008;  
14 Undurraga et al., 2010; Macherey et al., 2011). A possible reason for this  
15 discrepancy, consistent with computational models (Rattay, 1999; Rattay et al.,  
16 2001), is that cathodic stimulation depolarizes the peripheral processes of the  
17 auditory nerve. These processes are likely to be intact in the recently-deafened  
18 animals used in most physiological experiments. However, there is evidence that  
19 peripheral processes are more susceptible than central axons to auditory  
20 deprivation, and so may have deteriorated in human CI users who have been deaf  
21 for months or years prior to implantation (Johnsson et al., 1981).

22  
23  
24  
25  
26  
27  
28  
29  
30  
31  
32  
33  
34  
35  
36  
37  
38  
39  
40  
41  
42  
43  
44  
45  
46  
47  
48  
49  
50  
51  
52  
53  
54  
55  
56  
57  
58  
59  
60  
61  
62  
63  
64  
65  
Polarity sensitivity differs across electrodes not only at MCL but also at  
threshold. Unlike MCL measures, the direction of the polarity sensitivity at  
threshold varies consistently across listeners and electrodes, and some electrode-  
listener combinations reveal lower thresholds for cathodic than for anodic

1 stimulation (Macherey et al., 2017; Mesnildrey et al., 2017). These combinations  
2 may reflect local regions of good neural survival in which a relatively high  
3 proportion of peripheral processes remain. Here we investigate whether this  
4 putative measure of neural survival correlates with measures of gap detection,  
5 low-rate discrimination, and the upper limit of temporal pitch obtained in our  
6 previous studies (Bierer et al., 2015; Cosentino et al., 2016). The hypothesis is that  
7 lower thresholds for cathodic than for anodic stimulation will correlate with tasks  
8 that depend on good local neural survival. Note, however, that this does not  
9 require that the variation in performance on those tasks is limited by the pattern  
10 of activity in the auditory nerve; rather, poor auditory nerve survival may lead to  
11 more central degeneration which in turn could limit performance on perceptual  
12 tasks. For example, Carlyon and Deeks (2015) found that the “alternating  
13 amplitude” pattern of auditory-nerve evoked responses (Wilson, 1997) to high-rate  
14 pulse trains correlated across subjects with poor rate discrimination at high rates,  
15 but also demonstrated that the correlation was not causal, and that manipulating  
16 the stimulus so as to reduce the alternating-amplitude pattern did not improve  
17 performance.

18  
19  
20  
21  
22  
23  
24  
25  
26  
27  
28  
29  
30  
31  
32  
33  
34  
35  
36  
37  
38  
39  
40  
41  
42 A second prediction is that polarity sensitivity will correlate with the average  
43 of the thresholds in the two polarities, on the assumption that better sensitivity to  
44 cathodal stimulation will reflect better neural survival and hence lower overall  
45 thresholds. Specifically, we assume that the average thresholds will also depend on  
46 the distance of the electrodes from the modiolus (electrode-modiolus distance,  
47 “EMD”) but that the effects of EMD and polarity are independent. In the discussion  
48 section we describe a recent study that provides evidence for this assumption.  
49  
50  
51  
52  
53  
54  
55  
56  
57  
58  
59  
60  
61  
62  
63  
64  
65

1  
2  
3  
4  
5  
6  
7  
8  
9  
10  
11  
12  
13  
14  
15  
16  
17  
18  
19  
20  
21  
22  
23  
24  
25  
26  
27  
28  
29  
30  
31  
32  
33  
34  
35  
36  
37  
38  
39  
40  
41  
42  
43  
44  
45  
46  
47  
48  
49  
50  
51  
52  
53  
54  
55  
56  
57  
58  
59  
60  
61  
62  
63  
64  
65

When comparing performance on different tasks, two types of measure are possible. One of these is to correlate performance across subjects (e.g., Fu, 2002; Won et al., 2011; Cosentino et al., 2016). This can harness the often substantial across-listener variability in performance, but is potentially susceptible to non-specific effects such as attention span and cognitive ability. Such effects could lead to a correlation that does not reflect any common processing of the two tasks, except at very central levels. A more rigorous approach is to partial out between-subject effects, and to correlate the relative pattern of scores across electrodes (Bierer, 2007; Cosentino et al., 2015; Zhou and Pfungst, 2016). This approach is immune to between-listener cognitive differences. Across-electrode differences are also of more clinical relevance because, as mentioned above, they may guide channel-selection methods that aim to optimize performance on a listener-by-listener basis. However, because this type of analysis excludes the substantial variation in neural survival that occurs across listeners, for example due to differences in pathology (e.g. Zimmermann et al., 1995; e.g. Nadol, 1997), it risks “throwing the baby out with the bath water”. We perform both types of analysis here. One advantage of studying polarity sensitivity is that, being a difference between two thresholds, is unlikely to be affected by between-listener variation in cognition. Hence it may exploit the benefits of measuring the substantial across-listener variation in neural survival without being strongly influenced by cognitive effects.

## Methods

### Subjects

Eight ears from seven post-lingually deafened adults wearing the Advanced Bionics HiRes90K CI were studied; listener details are shown in Table 1. One subject, who was bilaterally implanted, was tested in each ear and is listed as S30L and S39R in the table. This subject's two ears were treated as completely separate, and therefore, for the purposes of analysis and for discussion in the remainder of this article, there were eight "subjects". They had all participated in the study by Cosentino *et al* (2016) and the same subject codes are used here. Five of the subjects were implanted and tested in Cambridge, UK, whereas the other three were implanted and tested in Seattle, WA, USA. All procedures were approved by the respective Human Subjects Review Boards.

### Stimuli

Triphasic pulses were used, in which the amplitude of the central phase was twice that of each of the first and third phases. They are named here in terms of the central high-amplitude phase, which was anodic for stimulus TP-A and cathodic for stimulus TP-C. (Note that here we use the abbreviation "TP" to refer to the triphasic pulse shape, rather than to tripolar stimulation mode as in some other articles). Phase durations were 43  $\mu$ s, the pulse rate was 99 pulses per second, and the duration of each pulse train was 400 ms. Each subject was tested on the same four or five electrodes as used for the rate discrimination and gap detection measures by Cosentino *et al* (2016). All stimuli were presented in monopolar mode. Initially MCLs were obtained for each combination of subject and electrode, so as to guide the starting level for the threshold measurements and to set a safety limit



1 for those procedures. After each stimulus was presented the subject indicated its  
2 loudness using the Advanced Bionics loudness rating scale for which a “6” is “Most  
3 Comfortable” and a “7” is “Loud but Comfortable”. The level was increased  
4 gradually until the rating was “7” and then reduced until the listener reported a  
5 “6” again. All stimuli were presented and controlled using research hardware and  
6 software (“BEDCS”) provided by the Advanced Bionics company. Programs were  
7 written using the MATLAB programming environment, which controlled low-level  
8 BEDCS routines. Stimuli were checked using a test implant and digital storage  
9 oscilloscope. The same software and type of hardware were used at both testing  
10 sites (Cambridge and Seattle).  
11  
12  
13  
14  
15  
16  
17  
18  
19  
20  
21  
22  
23  
24

25 Signal detection thresholds were measured using a three-down, one-up,  
26 two-interval forced choice adaptive procedure that converged on 79% correct. Step  
27 size was 1 dB for the first two turnpoints and 0.25 dB thereafter. The mean of the  
28 last four of six turnpoints were used to estimate threshold. Four repetitions were  
29 performed for each measurement. Subjects were asked “Which interval contained  
30 the sound?” and responded by selecting a button on a computer screen. Correct-  
31 answer feedback was provided at the end of each trial.  
32  
33  
34  
35  
36  
37  
38  
39  
40  
41  
42  
43  
44  
45

## 46 Results

47  
48 Thresholds ( $T_s$ ) for each subject are shown for the TP-A (red triangles) and  
49 TP-C (blue circles) stimuli in Fig. 1. It can be seen that the polarity effect ( $T_{TP-C}$ -  
50  $T_{TP-A}$ ) varies across subjects and electrodes. Of the 33 subject-electrode  
51 combinations, 9 showed a lower threshold for the TP-C than for the TP-A stimulus,  
52  
53  
54  
55  
56  
57  
58  
59  
60  
61  
62  
63  
64  
65

1 and hence a negative polarity effect. Recall that, according to our hypothesis, low  
2 or negative polarity effects reflect good neural survival.  
3

4  
5 *Between-electrode correlations*  
6

7  
8 To assess between-electrode correlations we performed univariate ANOVAs  
9 with one factor as the dependent variable, the other as a covariate, and with  
10 subject entered as a random effect. This revealed a significant positive correlation  
11 between the polarity effect and the average of the TP-A and TP-C thresholds  
12 (r=0.49, F(1,24)=7.59, p=0.011). Our statistical approach is mathematically  
13 equivalent to subtracting each subject's mean score from every data point, so as  
14 to obtain a normalized score, and then correlating these normalized scores. The  
15 resulting correlation is shown in Fig. 2. It is in the direction by the hypothesis that  
16 lower/negative polarity effects and lower overall thresholds both reflect better  
17 survival of the peripheral processes. Note that, although the difference between  
18 two scores will *a priori* be correlated with each score alone, no such *a priori*  
19 relationship holds between the difference and the *average* of two scores (Oldham,  
20 1962; Tu and Gilthorpe, 2007). This is true even when the two scores correlate  
21 with each other. For example, if EMD and neural survival combine additively to  
22 affect thresholds, then the across-electrode variation in EMD will produce a  
23 correlation between TP-A and TP-C thresholds; however this additive effect will  
24 not cause the mean and difference to correlate with each other.  
25  
26  
27  
28  
29  
30  
31  
32  
33  
34  
35  
36  
37  
38  
39  
40  
41  
42  
43  
44  
45  
46  
47  
48  
49

50 Although there was a significant across-electrode correlation between the  
51 polarity effect and the average thresholds, there was no significant correlation  
52 between either of them and any of the supra-threshold measures obtained in our  
53 previous studies. Those measures were the log of the gap detection thresholds  
54  
55  
56  
57  
58  
59  
60  
61  
62  
63  
64  
65

1 (GDTs) measured by Bierer *et al* (2015), and two rate discrimination measures  
2 (“RDR100” and “RDR400”) obtained by Cosentino *et al* (2016). One of those,  
3  
4 RDR100, is the log of the ratio between two just-discriminable pulse rates, where  
5 the standard had a rate of 100 pps and the signal, whose rate was always above  
6  
7 100 pps was adaptively varied to obtain threshold. The other, “RDR400”, was  
8  
9 similar except that the standard had a rate of 400 pps and the signal always had a  
10  
11 rate lower than 400 pps. The two measures reflect low-rate discrimination and the  
12  
13 “upper limit” of temporal pitch, respectively. In both cases low values represent  
14  
15 better performance. The between-electrode correlations are shown in Table 2.  
16  
17  
18  
19  
20  
21

22 We also investigated the effect of the longitudinal electrode position in the  
23  
24 array. Bierer *et al* (2007) reported a trend for thresholds to decrease from the  
25  
26 base to the apex of the electrode array for symmetric biphasic pulses presented in  
27  
28 partial tripolar mode, but not in bipolar or monopolar mode. They suggested that  
29  
30 this could be due to the progression of spiral ganglion degeneration from base to  
31  
32 apex in several pathologies (Zimmermann *et al.*, 1995), and/or to a variation in  
33  
34 the EMD along the array. Subsequently, Bierer *et al* (2015) found that thresholds  
35  
36 decreased from base to apex for symmetric biphasic pulses presented both in  
37  
38 partial tripolar and monopolar mode. A similar finding was observed in the present  
39  
40 data for the average of the TP-A and TP-C thresholds, as assessed by a univariate  
41  
42 ANOVA with average threshold as dependent variable, subject as a random effect,  
43  
44 and electrode number as covariate ( $F(1,24)=11.41$ ,  $p=0.002$ ). However, no such  
45  
46 finding was observed for the polarity effect ( $F(1,24)=2.76$ ,  $p=0.16$ ). Hence, if the  
47  
48 polarity effect reflects neural survival, the present results provide no evidence  
49  
50 that, for this group of subjects, the effect of longitudinal electrode position on  
51  
52 average thresholds was due to a variation in the pattern of neural survival.  
53  
54  
55  
56  
57  
58  
59  
60  
61  
62  
63  
64  
65

1  
2  
3 *Between-subject correlations*  
4

5  
6 Between-subject correlations were obtained by calculating the average score  
7  
8 across electrodes for each subject and then performing product-moment  
9  
10 correlations. The correlation between the polarity effect and the average  
11  
12 threshold was in the same direction as for the between-electrode correlations, but  
13  
14 did not reach statistical significance ( $r=0.60$ ,  $df=6$ ,  $p=0.16$ ). The correlations  
15  
16 between each of these measures and the supra-threshold scores obtained  
17  
18 previously (GDT, RDR100, and RDR400) are shown in Table 3. All of the correlations  
19  
20 were positive, three reached statistical significance, and two did so after  
21  
22 Bonferroni correction for multiple comparisons. One of these was between the  
23  
24 average threshold and GDT ( $r=0.87$ ,  $df=6$ ,  $p=0.0050$ , corrected  $p=0.03$ ). The other  
25  
26 was between the polarity effect and RDR400 ( $r=0.91$ ,  $df=6$ ,  $p=0.0017$ , corrected  
27  
28  $p=0.01$ ). As noted in the Introduction it is unlikely that the second of these can be  
29  
30 explained in terms of cognitive factors, such as the ability or willingness to  
31  
32 concentrate on the task, because the polarity effect is a difference score.  
33  
34  
35  
36  
37  
38  
39  
40  
41  
42

43 **Discussion**  
44

45  
46 *Comparison to previous studies*  
47

48  
49 A large number of psychophysical and electrophysiological studies have  
50  
51 demonstrated CI users' greater sensitivity to anodic than to cathodic current for  
52  
53 moderately and comfortably loud stimuli (Macherey et al., 2006; Macherey et al.,  
54  
55 2008; van Wieringen et al., 2008; Undurraga et al., 2010; Macherey et al., 2011).  
56  
57 More recently, two studies have shown that, although detection thresholds do not  
58  
59  
60  
61  
62  
63  
64  
65

1 differ overall between stimuli of opposite polarity, individual CI listeners show  
2 idiosyncratic but consistent polarity effects.  
3  
4

5       Macherey *et al.* (2017) measured thresholds for trains of symmetric biphasic  
6 pulses with either anodic or cathodic leading polarity (“SYM-A” and “SYM-C”), as  
7 well as for trains of so-called quadraphasic (“QP”) pulses. The QP pulses were  
8 constructed by abutting two SYM pulses of opposite leading polarity, such that the  
9 central portion consisted of two anodic (QP-A) or cathodic (QP-C) phases. A  
10 previous study had shown that, as for the TP-A and TP-C pulse trains used here and  
11 for pseudomonophasic pulse trains, the loudness of supra-threshold QP-A pulse  
12 trains was consistently greater than that of QP-C pulse trains at the same current  
13 (Carlyon *et al.*, 2013). Macherey *et al* (2017) found that, across subjects, the  
14 difference between QP-A and QP-C thresholds correlated strongly with that  
15 between SYM-A and SYM-C thresholds, demonstrating that the idiosyncratic  
16 differences observed across subjects were not simply due to measurement noise.  
17 In addition, they reported that, for some electrode-listener combinations, the  
18 loudness growth function was non-monotonic, and that this unusual pattern was  
19 significantly more likely to occur when thresholds were lower for QP-C than for QP-  
20 A pulse trains. They suggested, as we do here, that low QP-C thresholds may  
21 reflect good local survival and activation of peripheral processes. They further  
22 suggested that nonmonotonic loudness growth might then be explained by  
23 “cathodal block” (Ranck, 1975) impeding the propagation of action potentials as  
24 level was increased. Interestingly, they only observed non-monotonic growth for  
25 users of the Cochlear CI; when they tested five Advanced Bionics users on one  
26 electrode each, the loudness growth was always monotonic. The fact that we  
27 reported several instances of negative polarity effects raises the possibility that,  
28  
29  
30  
31  
32  
33  
34  
35  
36  
37  
38  
39  
40  
41  
42  
43  
44  
45  
46  
47  
48  
49  
50  
51  
52  
53  
54  
55  
56  
57  
58  
59  
60  
61  
62  
63  
64  
65

1 for those electrode-subject combinations, the loudness growth may also have been  
2 non-monotonic. A stronger test of this hypothesis would involve measuring  
3 loudness growth functions for the subject-electrode combinations showing the  
4 most negative polarity effects, such as C3 (electrode 15, -2.2 dB), C5 (electrode 7,  
5 -1.3 dB), and S22 (electrode 5, -2.45 dB).  
6  
7  
8  
9  
10

11  
12 More recently, Mesnildrey *et al* (2017) measured thresholds using a fast one-  
13 interval adjustment procedure for trains of TP-A and TP-C pulses presented in  
14 partial tripolar mode. Their measurements, obtained with multiple electrodes in  
15 16 ears, revealed that thresholds were lower for TP-C than for TP-A pulse trains in  
16 22% (48/219) of electrodes. This percentage was very similar to the corresponding  
17 value of 27% (9/33) in the present study. Another similarity is that they found a  
18 positive across-electrode correlation between the polarity effect and the threshold  
19 for a SYM-C pulse train, analogous to our correlation between the polarity effect  
20 and overall threshold. However, their correlation was quite weak, accounting only  
21 for about 5% of the variance. More recently, Goehring *et al* (2018) used a method  
22 similar to that of Mesnildrey *et al* (2017) to measure TP-A and TP-C thresholds in  
23 eight subjects. They also reported a weak positive correlation which, in their case,  
24 was not significant. Clearly, then, the size and significance of the correlation  
25 depends on the particular group of subjects and/or electrodes studied. Indeed,  
26 inspection of Fig. 2 reveals that the correlation was, for example, strong for  
27 subjects S22 and C6 and absent for others, such as C4 and C5. In terms of our  
28 hypothesis, it may be that large correlations occur when the EMD is constant, and  
29 neural survival varies markedly, along the length of the cochlea. More generally,  
30 it is worth noting that although the across-electrode comparisons reported here  
31  
32  
33  
34  
35  
36  
37  
38  
39  
40  
41  
42  
43  
44  
45  
46  
47  
48  
49  
50  
51  
52  
53  
54  
55  
56  
57  
58  
59  
60  
61  
62  
63  
64  
65

1 and elsewhere involve a reasonably high number of degrees of freedom, they are  
2 obtained from only a modest number of subjects.  
3

4  
5 With the above caveats, of particular interest in the study by Mesnildrey *et al*  
6 (2017) is their analysis of CT scans from nine ears, which allowed them to derive  
7 an estimate of the electrode-modiolar distance (EMD) for each subject. Although  
8 the EMD accounted for between 63 and 68% of the between-subject variance in  
9 thresholds, it accounted for only a small proportion of the between-electrode  
10 variance. The authors suggested that this was due to EMD varying substantially  
11 between but not within ears. They also showed that the EMD did not correlate  
12 significantly with the polarity effect. This is important for the interpretation of the  
13 present results because it is possible that the site of excitation, and hence the  
14 polarity effect, was affected by the EMD. If such a correlation had been found, this  
15 would have provided an alternative to our interpretation that the correlation  
16 between the polarity effect and overall thresholds was mediated by neural  
17 survival.  
18  
19  
20  
21  
22  
23  
24  
25  
26  
27  
28  
29  
30  
31  
32  
33  
34  
35  
36

37  
38 Zhou and Pfingst (2016) also obtained thresholds for multiple electrodes and  
39 estimated EMDs from the data relating EMD to electrode number reported by Long  
40 *et al.* (2014). They did not report the correlation directly but did state that MPI,  
41 defined as the difference between thresholds for 80- and 640-pps pulse trains,  
42 correlated with the EMD. Their data showed generally greater across-electrode  
43 threshold variations at 80 pps than at 640 pps, and so it is likely that the variation  
44 in the MPI was driven mainly by the 80-pps thresholds. If so, then those thresholds  
45 would have correlated positively with the EMD. However, they do not state how  
46 much of the variation in 80-pps thresholds was accounted for by EMD, nor whether  
47 a substantial across-electrode (rather than across-listener) correlation was  
48  
49  
50  
51  
52  
53  
54  
55  
56  
57  
58  
59  
60  
61  
62  
63  
64  
65

1 observed. In addition it is possible, as suggested by Mesnildrey (2017), that the  
2 across-electrode variation in EMD for a given subject may be smaller for Advanced  
3 Bionics listeners (as tested here) than for the Cochlear CI24RE listeners studied by  
4 Zhou and Pfingst (2016) and by Long *et al* (Long et al., 2014; Zhou and Pfingst,  
5 2016). Mesnildrey reported that the average range of EMDs, across listeners, was  
6 0.75 mm in his study compared to 1.2 mm in Long *et al*'s study; an intermediate  
7 value of 1.00 mm is revealed by an analysis of the 10 Advanced Bionics listeners  
8 studied by de Vries *et al.* (2016).  
9

### 20 *Relationship to supra-threshold tasks*

23 Table 3 shows the across-subject correlations between the two measures  
24 obtained here - average thresholds and the polarity effect - and the supra-  
25 threshold measures reported previously by our laboratories (Bierer et al., 2015;  
26 Cosentino et al., 2016). Two correlations were statistically significant after  
27 Bonferroni correction: average thresholds vs. log GDTs, and the polarity effect vs  
28 RDR400 (which is a measure of the upper limit of temporal pitch). This does not  
29 mean, though, that log GDTs are more strongly related to average thresholds than  
30 to polarity, or that RDR400 is more strongly correlated with the polarity effect  
31 than with average thresholds. Such a conclusion would require that these two  
32 correlations were significantly larger than, respectively, those between polarity vs  
33 log GDT and average threshold vs. log400R. This was not the case (Williams test,  
34 df=5, two-tailed p=0.07 and 0.14 for GDT and RDR400 respectively). The safest  
35 conclusion is that both low average thresholds and a small or negative polarity  
36 effect correlate with good performance on some supra-threshold tasks, including  
37 gap detection and a measure (RDR400) of the upper limit of temporal pitch. There  
38 is also evidence from Mesnildrey *et al* (2017) that, across subjects, small or  
39  
40  
41  
42  
43  
44  
45  
46  
47  
48  
49  
50  
51  
52  
53  
54  
55  
56  
57  
58  
59  
60  
61  
62  
63  
64  
65



1 negative polarity effects correspond to low thresholds on a spectro-temporal ripple  
2 test (Aronoff and Landsberger, 2013). In addition, Zhou and Pfingst (2016) showed  
3 that high thresholds for 80-pps pulse trains - similar to the rate used here,  
4 correlated significantly, both across subjects and electrodes, with poor spatial  
5 selectivity as measured using forward masking. A *caveat* is that they measured  
6 spatial selectivity by measuring the slope relating masker position to the amount  
7 of masking of a fixed probe. This measures the spread of excitation produced by  
8 the maskers rather than by the signal.  
9

10  
11  
12  
13  
14  
15  
16  
17  
18  
19  
20 Finally, it is worth noting that Zhou (2017) has recently observed substantial  
21 and significant improvements, both in speech perception and on a spectro-  
22 temporal ripple test, by de-activating electrodes with high low-rate thresholds. As  
23 they have pointed out, such high thresholds may reflect a combination of large  
24 EMD and poor local neural survival. If, as we have argued, the polarity effect is  
25 more affected by local neural survival (specifically that of the peripheral  
26 processes) then this may have two implications for the potential improvement of  
27 patient outcomes by re-programming the clinical map. First, in devices such as the  
28 one studied here, where EMD variation across the array may be less than in the  
29 Cochlear CI24RE device, variations in spatial selectivity may be more strongly  
30 driven by neural survival, and it may be beneficial to have a measure that is  
31 specific to that parameter. Second, computational models (e.g. Goldwyn et al.,  
32 2010) indicate that, in devices that allow focused stimulation methods such as the  
33 tripolar mode, the appropriate intervention in cases of locally high thresholds  
34 depends on the cause. Specifically, Bierer and Litvak (2016) have argued that  
35 electrodes with a large EMD should be stimulated in tripolar mode, whereas those  
36 in neural “dead regions” should be de-activated. Again, a measure that  
37  
38  
39  
40  
41  
42  
43  
44  
45  
46  
47  
48  
49  
50  
51  
52  
53  
54  
55  
56  
57  
58  
59  
60  
61  
62  
63  
64  
65

1  
2  
3  
4  
5  
6  
7  
8  
9  
10  
11  
12  
13  
14  
15  
16  
17  
18  
19  
20  
21  
22  
23  
24  
25  
26  
27  
28  
29  
30  
31  
32  
33  
34  
35  
36  
37  
38  
39  
40  
41  
42  
43  
44  
45  
46  
47  
48  
49  
50  
51  
52  
53  
54  
55  
56  
57  
58  
59  
60  
61  
62  
63  
64  
65

differentiates between these two situations could provide significant clinical advantages.

### Summary and conclusions

- (i) Consistent with recent reports, polarity sensitivity at threshold varies across listeners and electrodes. Specifically, thresholds were lower for TP-C than for TP-A pulses for 27% of the electrode-subject combinations tested here.
- (ii) There was a significant trend for thresholds to be lower for more apical electrodes. However the polarity effect did not vary significantly as a function of longitudinal electrode position.
- (iii) There was a modest but significant across-electrode correlation between the polarity effect and the average threshold for the two polarities. The direction of the correlation was that lower thresholds for TP-C than for TP-A pulses corresponded to lower average thresholds. The correlation was in the same direction but larger than observed in two recent reports.
- (iv) Across subjects, the polarity effect correlated with the rate discrimination at high rates, as measured by Cosentino *et al* (Cosentino *et al.*, 2016). The direction of the effect was that lower thresholds for TP-C than for TP-A pulses corresponded to better rate discrimination.
- (v) The results are consistent with, but do not prove, the idea that the polarity effect is an indicator of good neural survival, which in turn

influences detection thresholds and performance on some supra-  
threshold tasks.

### Acknowledgments

We thank Lindsay DeVries for generously providing the EMD measurements from her study. This research was supported by awards RG91365 (Medical Research Council, Carlyon), MC-A060-5PQ75 (Action on Hearing Loss, Carlyon), and DC012142 (National Institute of Health, Arenberg).

1  
2  
3  
4  
5  
6  
7  
8  
9  
10  
11  
12  
13  
14  
15  
16  
17  
18  
19  
20  
21  
22  
23  
24  
25  
26  
27  
28  
29  
30  
31  
32  
33  
34  
35  
36  
37  
38  
39  
40  
41  
42  
43  
44  
45  
46  
47  
48  
49  
50  
51  
52  
53  
54  
55  
56  
57  
58  
59  
60  
61  
62  
63  
64  
65

**Table 1.** Details of the listeners who took part. IDs starting with the letter S refer to patients implanted and tested in Seattle, USA. Those beginning with the letter C were implanted and tested in Cambridge, UK. “Subjects” S30L and S39R refer to the left and right ears of the same participant, and are treated separately throughout this article.

| <b>ID</b> | <b>Age (years)</b> | <b>Deafness Onset (age, years)</b> | <b>Possible Aetiology</b> | <b>Duration of CI use</b> |
|-----------|--------------------|------------------------------------|---------------------------|---------------------------|
| S22       | 74                 | 55                                 | Hereditary                | 7 yr                      |
| S30L      | 51                 | 16                                 | Hereditary                | 11 yr                     |
| S39R      | 51                 | 16                                 | Hereditary                | 31 yr                     |
| C1        | 69                 | 32                                 | Unknown                   | 5 yr                      |
| C3        | 71                 | 50                                 | Otosclerosis              | 4 yr                      |
| C4        | 68                 | 37                                 | Otosclerosis              | 6 yr                      |
| C5        | 55                 | 31                                 | Unknown                   | 6 yr                      |
| C6        | 66                 | 51                                 | Unknown                   | 3 yr                      |

Table 2. Across-electrode correlations between the average threshold across polarities and the polarity effect with the logarithms of gap detection thresholds (GDTs), and of rate discrimination measures at low (RDR100) and high (RDR400) rates. The correlations were obtained by subtracting each subject's mean score from every point, thereby removing between-subject effects. This is equivalent to performing an analysis of covariance with one measure as the dependent variable, the other as a covariate, and subject as a random factor (Bland and Altman, 1995). In all cases there were 24 degrees of freedom. The 1% and 5% significance levels for  $df=24$  are, respectively, 0.50 and 0.39.

|          | GDT   | RDR100 | RDR400 |
|----------|-------|--------|--------|
| average  | 0.24  | 0.09   | -0.35  |
| polarity | -0.08 | 0.06   | -0.29  |

Table 3. Across-subject correlations between the average threshold across polarities and the polarity effect with the logarithms of gap detection thresholds (GDTs), and of rate discrimination measures at low (RDR100) and high (RDR400) rates. The correlation between the average threshold and the polarity effect was 0.6. Statistically significant correlations are shown in bold; those that survived Bonferonni corrections for six comparisons are additionally underlined (see text for details). The number of degrees of freedom was 6 in all cases. The 1% and 5% significance levels for  $df=6$  are, respectively, 0.83 and 0.71.

|          | GDT                | RDR100      | RDR400             |
|----------|--------------------|-------------|--------------------|
| average  | <b><u>0.87</u></b> | <b>0.72</b> | 0.61               |
| polarity | 0.41               | 0.49        | <b><u>0.91</u></b> |

1  
2  
3  
4  
5  
6  
7  
8  
9  
10  
11  
12  
13  
14  
15  
16  
17  
18  
19  
20  
21  
22  
23  
24  
25  
26  
27  
28  
29  
30  
31  
32  
33  
34  
35  
36  
37  
38  
39  
40  
41  
42  
43  
44  
45  
46  
47  
48  
49  
50  
51  
52  
53  
54  
55  
56  
57  
58  
59  
60  
61  
62  
63  
64  
65

## References

- 1  
2  
3 Aronoff JM, Landsberger DM (2013) The development of a modified spectral ripple test.  
4  
5 Journal of the Acoustical Society of America 134:EL217-EL222.  
6  
7  
8 Bierer JA (2007) Threshold and channel interaction in cochlear implant users: Evaluation of  
9  
10 the tripolar electrode configuration. J Acoust Soc Am 121:1642-1653.  
11  
12  
13 Bierer JA, Faulkner KF (2010) Identifying Cochlear Implant Channels with Poor Electrode-  
14  
15 Neuron Interface: Partial Tripolar, Single-Channel Thresholds and Psychophysical  
16  
17 Tuning Curves Ear Hear 32:633-633.  
18  
19  
20 Bierer JA, Litvak L (2016) Reducing Channel Interaction Through Cochlear Implant  
21  
22 Programming May Improve Speech Perception: Current Focusing and Channel  
23  
24 Deactivation. Trends in Hearing 20.  
25  
26  
27 Bierer JA, Deeks JM, Billig AJ, Carlyon RP (2015) Comparison of Signal and Gap-Detection  
28  
29 Thresholds for Focused and Broad Cochlear Implant Electrode Configurations. Jaro-  
30  
31 Journal of the Association for Research in Otolaryngology 16:273-284.  
32  
33  
34 Bland JM, Altman DG (1995) Calculating correlation coefficients with repeated  
35  
36 observations: Part 1-correlation within subjects. British Medical Journal 310:446.  
37  
38  
39 Carlyon RP, Deeks JM (2015) Combined neural and behavioural measures of temporal pitch  
40  
41 perception in cochlear implant users. Journal of the Acoustical Society of America  
42  
43 138:2885-2905.  
44  
45  
46 Carlyon RP, Deeks JM, Macherey O (2013) Polarity effects on place pitch and loudness for  
47  
48 three cochlear-implant designs and at different cochlear sites. J Acoust Soc Am  
49  
50 134:503–509.  
51  
52  
53  
54 Cosentino S, Deeks JM, Carlyon RP (2015) Procedural factors that affect measures of spatial  
55  
56 selectivity in cochlear implant users. Trends in Hearing 19:1-16.  
57  
58  
59  
60  
61  
62  
63  
64  
65

1  
2  
3  
4  
5  
6  
7  
8  
9  
10  
11  
12  
13  
14  
15  
16  
17  
18  
19  
20  
21  
22  
23  
24  
25  
26  
27  
28  
29  
30  
31  
32  
33  
34  
35  
36  
37  
38  
39  
40  
41  
42  
43  
44  
45  
46  
47  
48  
49  
50  
51  
52  
53  
54  
55  
56  
57  
58  
59  
60  
61  
62  
63  
64  
65

Cosentino S, Carlyon RP, Deeks JM, Parkinson W, Bierer JA (2016) Rate discrimination, gap detection and ranking of temporal pitch in cochlear implant users. *J Assoc Otolaryngol* 17:371–382.

Devries L, Scheperle R, Bierer JA (2016) Assessing the Electro-Neuron Interface with the Electrically Evoked Compound Action Potential, Electrode Position, and Behavioral Thresholds. *Journal of the Association for Research in Otolaryngology* 17:237-252.

Fu Q-J (2002) Temporal processing and speech recognition in cochlear implant users. . *Neuroreport* 2002 13:1-5.

Garadat SN, Zwolan TA, Pfingst BE (2012) Across-Site Patterns of Modulation Detection: Relation to Speech Recognition. *J Acoust Soc Am* 131:4030-4041.

Garadat SN, Zwolan TA, Pfingst BE (2013) Using Temporal Modulation Sensitivity to Select Stimulation Sites for Processor MAPs in Cochlear Implant Listeners. *Audiol Neuro-Otol* 18:247-260.

Goehring T, Arenberg JG, Deeks JM, Carlyon RP (2018) Effect of a Channel-Selection Strategy based on Polarity Sensitivity on Speech Perception by Cochlear Implant Users. *Assoc Res Otolaryngol Abs*: 41:42.

Goldwyn JH, Bierer SM, Bierer JA (2010) Modeling the electrode-neuron interface of cochlear implants: Effects of neural survival, electrode placement, and the partial tripolar configuration. *Hearing Research* 268:93-104.

Hartmann R, Topp G, Klinke R (1984) Discharge patterns of cat primary auditory fibers with electrical-stimulation of the cochlea. *Hearing Research* 13:47-62.

Holden LK, Finley CC, Firszt JB, Holden TA, Brenner C, Potts LG, Gotter BD, Vanderhoof SS, Mispagel K, Heydebrand G, Skinner MW (2013) Factors Affecting Open-Set Word Recognition in Adults With Cochlear Implants. *Ear Hearing* 34:342-360.



- 1  
2  
3  
4  
5  
6  
7  
8  
9  
10  
11  
12  
13  
14  
15  
16  
17  
18  
19  
20  
21  
22  
23  
24  
25  
26  
27  
28  
29  
30  
31  
32  
33  
34  
35  
36  
37  
38  
39  
40  
41  
42  
43  
44  
45  
46  
47  
48  
49  
50  
51  
52  
53  
54  
55  
56  
57  
58  
59  
60  
61  
62  
63  
64  
65
- Johnsson LG, Hawkins JE, Jr., Kingsley TC, Black FO, Matz GJ (1981) Aminoglycoside-induced cochlear pathology in man. *Acta oto-laryngologica Supplementum* 383:1-19.
- Long CJ, Holden TA, McClelland GH, Parkinson WS, Shelton C, Kelsall DC, Smith ZM (2014) Examining the Electro-Neural Interface of Cochlear Implant Users Using Psychophysics, CT Scans, and Speech Understanding. *Journal of the Association for Research in Otolaryngology* 15:293-304.
- Macherey O, Deeks JM, Carlyon RP (2011) Extending the limits of place and temporal pitch perception in cochlear implant users. *Journal of the Association for Research in Otolaryngology* 12:233-251.
- Macherey O, Carlyon RP, Chatron J, Roman S (2017) Effect of Pulse Polarity on Thresholds and on Non-Monotonic Loudness Growth in Cochlear Implant Users. *Journal of the Association for Research in Otolaryngology* DOI: 10.1007/s10162-016-0614-4.
- Macherey O, Wieringen Av, Carlyon RP, Deeks JM, Wouters J (2006) Asymmetric pulses in cochlear implants: Effects of pulse shape, polarity and rate. *Jaro* 7:253-266.
- Macherey O, Carlyon RP, Deeks JM, van Wieringen A, Wouters J (2008) Higher sensitivity of human auditory nerve fibers to positive electrical currents. *Jaro-Journal of the Association for Research in Otolaryngology* 9:241-251.
- Mesnildrey Q (2017) Towards a Better Understanding of the Cochlear Implant In: Aix-Marseille.
- Mesnildrey Q, Macherey O, Carlyon RP, Venail F (2017) Polarity sensitivity in cochlear implants: relation with neural survival? In: Conference on Implantable Auditory Prostheses, p 197. Lake Tahoe, CA, USA.
- Miller CA, Abbas PJ, Robinson BK, Rubinstein JT, Matsuoka AJ (1999) Electrically evoked single-fiber action potentials from cat: responses to monopolar, monophasic stimulation. *Hearing Research* 130:197-218.

1 Miller CA, Abbas PJ, Hay-McCutcheon MJ, Robinson BK, Nourski KV, Jeng FC (2004)

2 Intracochlear and extracochlear ECAPs suggest antidromic action potentials. Hearing  
3 Research 198:75-86.  
4  
5

6  
7 Nadol JB (1997) Patterns of neural degeneration in the human cochlea and auditory nerve:

8 Implications for cochlear implantation. Otolaryngology-Head and Neck Surgery  
9  
10 117:220-228.  
11  
12

13  
14 Oldham PD (1962) A note on the analysis of repeated measurements of the same subjects. J

15  
16 Chronic Diseases 15:969-977.  
17  
18

19 Pfingst BE, Xu L (2004) Across-site variation in detection thresholds and maximum

20 comfortable loudness levels for cochlear implants. Jaro-Journal of the Association for  
21 Research in Otolaryngology 5:11-24.  
22  
23  
24  
25

26 Ranck JB (1975) Which elements are excited in electrical stimulation of mammalian nervous

27 system: a review. Brain Res 98:417-440.  
28  
29  
30

31 Rattay F (1999) The basic mechanism for the electrical stimulation of the nervous system.

32  
33 Neuroscience 89:335-346.  
34  
35

36 Rattay F, Lutter P, Felix H (2001) A model of the electrically excited human cochlear neuron

37  
38 I. Contribution of neural substructures to the generation and propagation of spikes.  
39  
40 Hearing Research 153:43-63.  
41  
42

43 Tu Y-K, Gilthorpe MS (2007) Revisiting the relation between change and initial value: A

44  
45 review and evaluation. Statist Med 26:443-457.  
46  
47

48 Undurraga JA, Wieringen Av, Carlyon RP, Macherey O, Wouters J (2010) Polarity Effects

49 on Neural Responses of the Electrically Stimulated Auditory Nerve at Different  
50 Cochlear Sites. Hearing Research 269:146-161.  
51  
52  
53

54 van Wieringen A, Macherey O, Carlyon RP, Deeks JM, Wouters J (2008) Alternative pulse

55  
56 shapes in electrical hearing. Hearing Research 242:154-163.  
57  
58  
59  
60  
61  
62  
63  
64  
65

1  
2  
3  
4  
5  
6  
7  
8  
9  
10  
11  
12  
13  
14  
15  
16  
17  
18  
19  
20  
21  
22  
23  
24  
25  
26  
27  
28  
29  
30  
31  
32  
33  
34  
35  
36  
37  
38  
39  
40  
41  
42  
43  
44  
45  
46  
47  
48  
49  
50  
51  
52  
53  
54  
55  
56  
57  
58  
59  
60  
61  
62  
63  
64  
65

Wilson BS (1997) The future of cochlear implants. *Brit J of Audiol* 31:205-225.

Won JH, Clinard CG, Kwon S, Dasika VK, Nie K, Drennan WR, Tremblay KL, Rubinstein JT (2011) Relationship Between Behavioral and Physiological Spectral-Ripple Discrimination. *Jaro-Journal of the Association for Research in Otolaryngology* 12:375-393.

Zhou N (2017) Deactivating stimulation sites based on low-rate thresholds improves spectral ripple and speech reception thresholds in cochlear implant users. *Journal of the Acoustical Society of America* 141:EL243-EL248.

Zhou N, Pfingst BE (2014) Relationship between multipulse integration and speech recognition with cochlear implants. *Journal of the Acoustical Society of America* 136:1257-1268.

Zhou N, Pfingst BE (2016) Evaluating multipulse integration as a neural-health correlate in human cochlear-implant users: Relationship to spatial selectivity. *Journal of the Acoustical Society of America* 140:1537-1547.

Zhou N, Kraft C, Colesa D, Pfingst B (2015) Integration of Pulse Trains in Humans and Guinea Pigs with Cochlear Implants. *Jaro-Journal of the Association for Research in Otolaryngology* 16:523-534.

Zimmermann CE, Burgess BJ, Nadol JB (1995) Patterns of degeneration in the human cochlear nerve. *Hearing Research* 90:192-201.

## Figure Legends

1  
2  
3 1) Thresholds as a function of electrode number for each listener. Thresholds for  
4  
5 TP-A stimuli are shown by red triangles, whereas those for TP-C stimuli are shown  
6  
7 by blue circles.  
8  
9

10  
11 2) Correlation between the average thresholds ( $A+C/2$ ) and the difference between  
12  
13 cathodic and anodic thresholds ( $C-A$ ), in decibels. Between subject differences  
14  
15 have been removed by subtracting the average value for each subject from every  
16  
17 data point for that subject. This normalization removes the effects of between-  
18  
19 subject correlations, leaving only the between-electrode correlation. Data for  
20  
21 each subject are shown by a unique symbol.  
22  
23  
24  
25  
26  
27  
28  
29  
30  
31  
32  
33  
34  
35  
36  
37  
38  
39  
40  
41  
42  
43  
44  
45  
46  
47  
48  
49  
50  
51  
52  
53  
54  
55  
56  
57  
58  
59  
60  
61  
62  
63  
64  
65

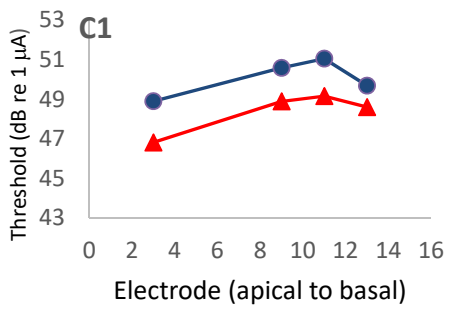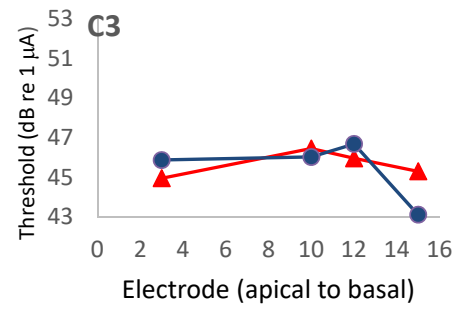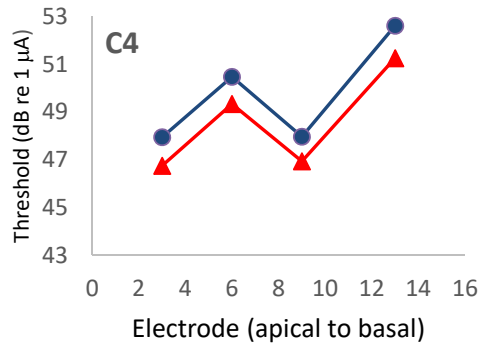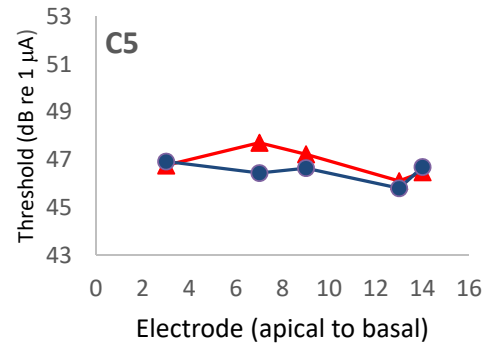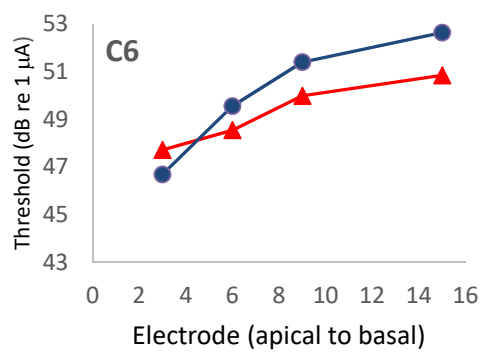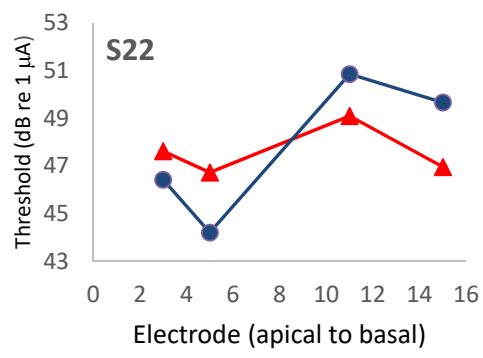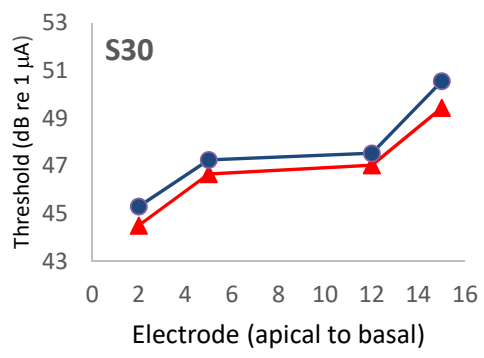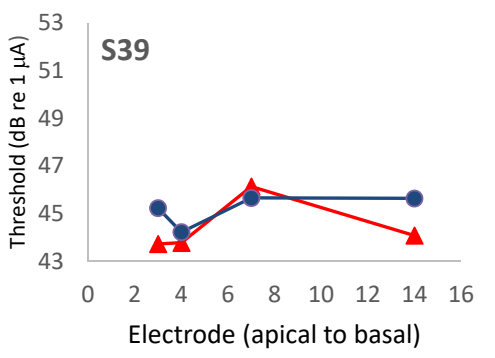

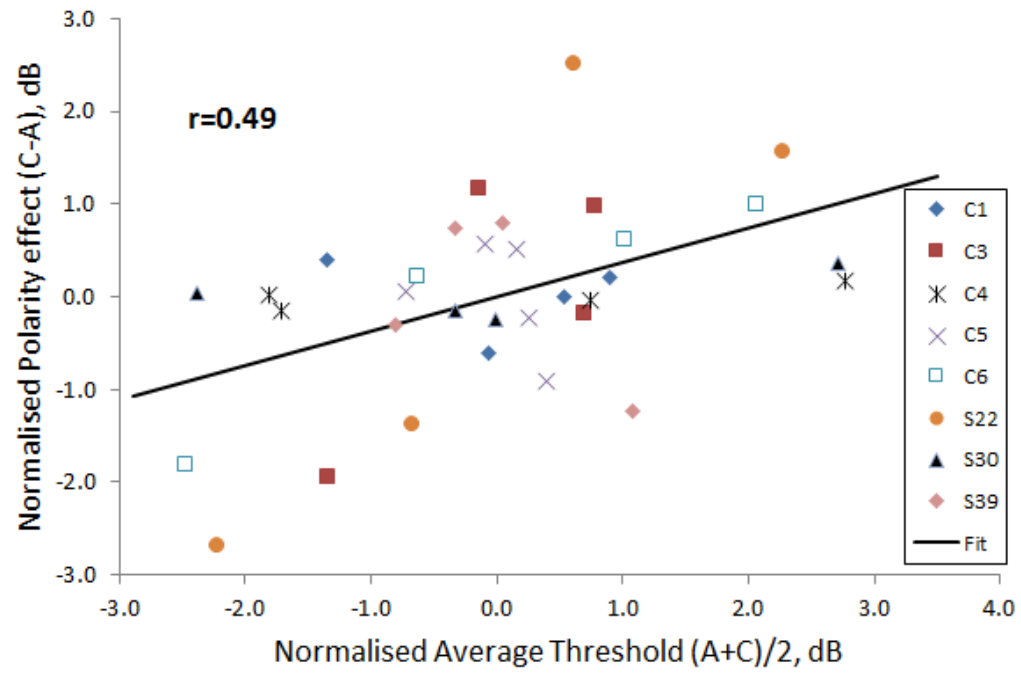

Source: http://biorxiv.org/content/10.1101/297085v1.full.pdf
